# Supplementary material
Source: Springer Nature journal article supplement (https://www.springermedizin.de/resource/supplementary/12947_2007_177_MOESM3_ESM.pdf/9556394)

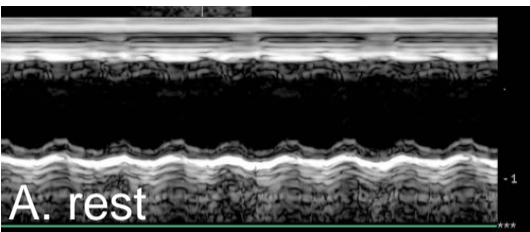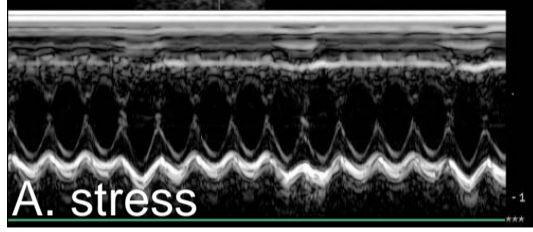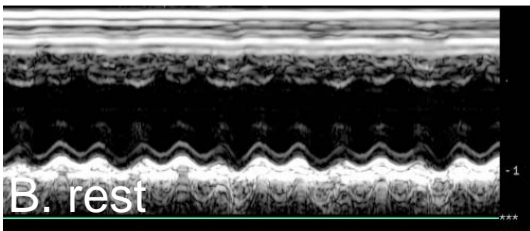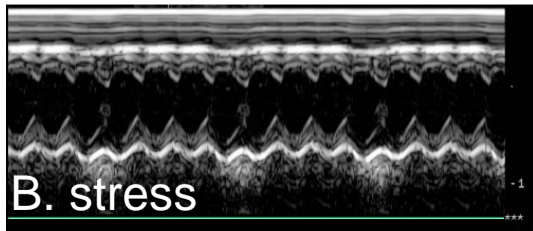

Supplement: MOESM3 [file 9556394]
